# Supplementary material
Source: PubMed Central journal article supplement (PMC2962424)
Supplement: NIHMS235726-supplement-01.pdf [file NIHMS235726-supplement-01.pdf]

# THE LANCET

## Supplementary webappendix

This webappendix formed part of the original submission and has been peer reviewed. We post it as supplied by the authors.

Supplement to: Abernethy AP, McDonald CF, Frith PA, et al. Effect of palliative oxygen versus room air in relief of breathlessness in patients with refractory dyspnoea: a double-blind, randomised controlled trial. *Lancet* 2010; **376**: 784–93.

**Figure 5: Impact of interventions on functional performance. The proportion of participants reporting the worse level of function on the MRC scale (level 4; “breathless while undressing”) is presented. The baseline is Day -1 since the measure is reported in the evening.**

Proportion with MRC= 'breathless when undressing' (worst level; category 4)

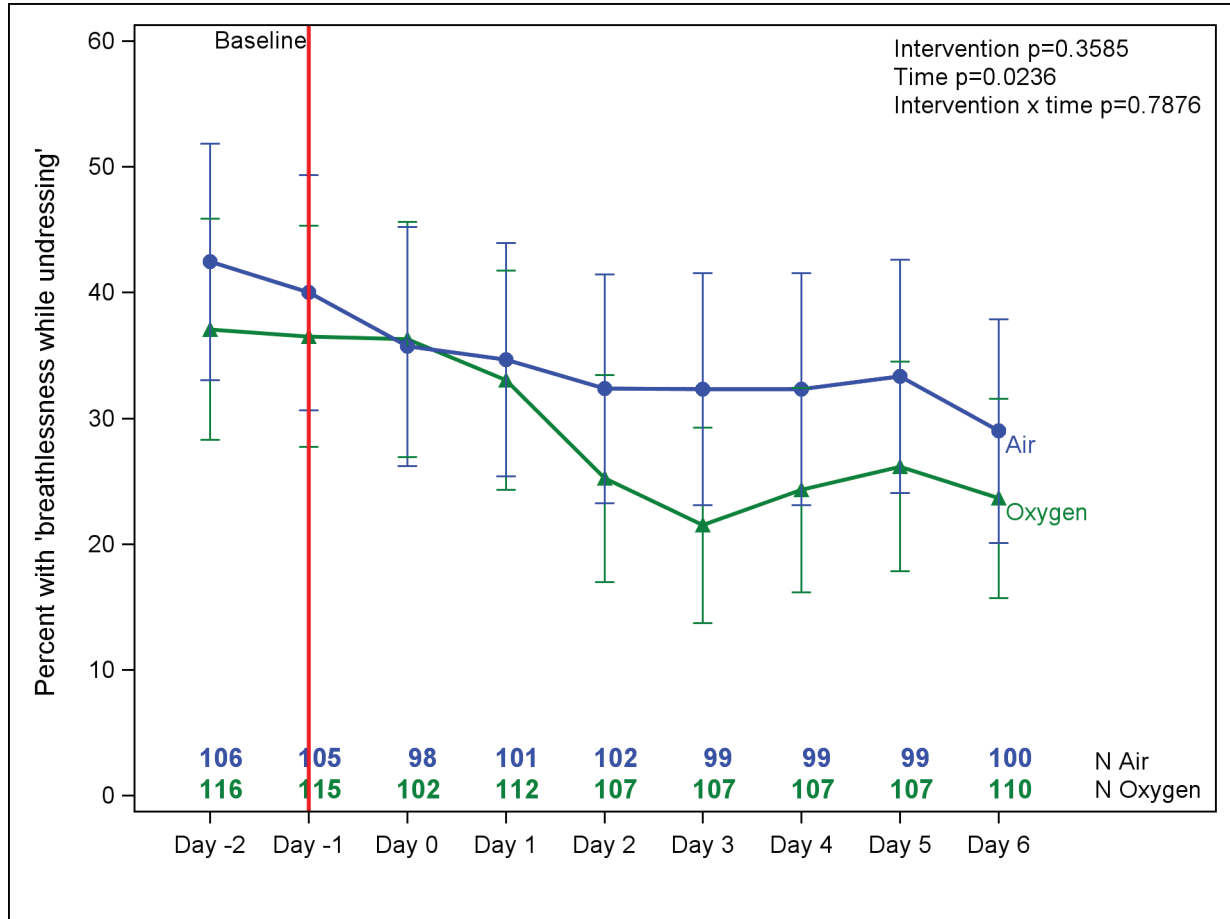

Footnote to figure 5 ('yes' = report of MRC category 4; CI = confidence interval)

**Figure 6: Impact of interventions on sleep.** Participants were asked the dichotomous question “was your sleep disturbed by breathlessness?” The proportion responding “yes” is presented. The baseline is Day 0 since the measure is reported in the morning.

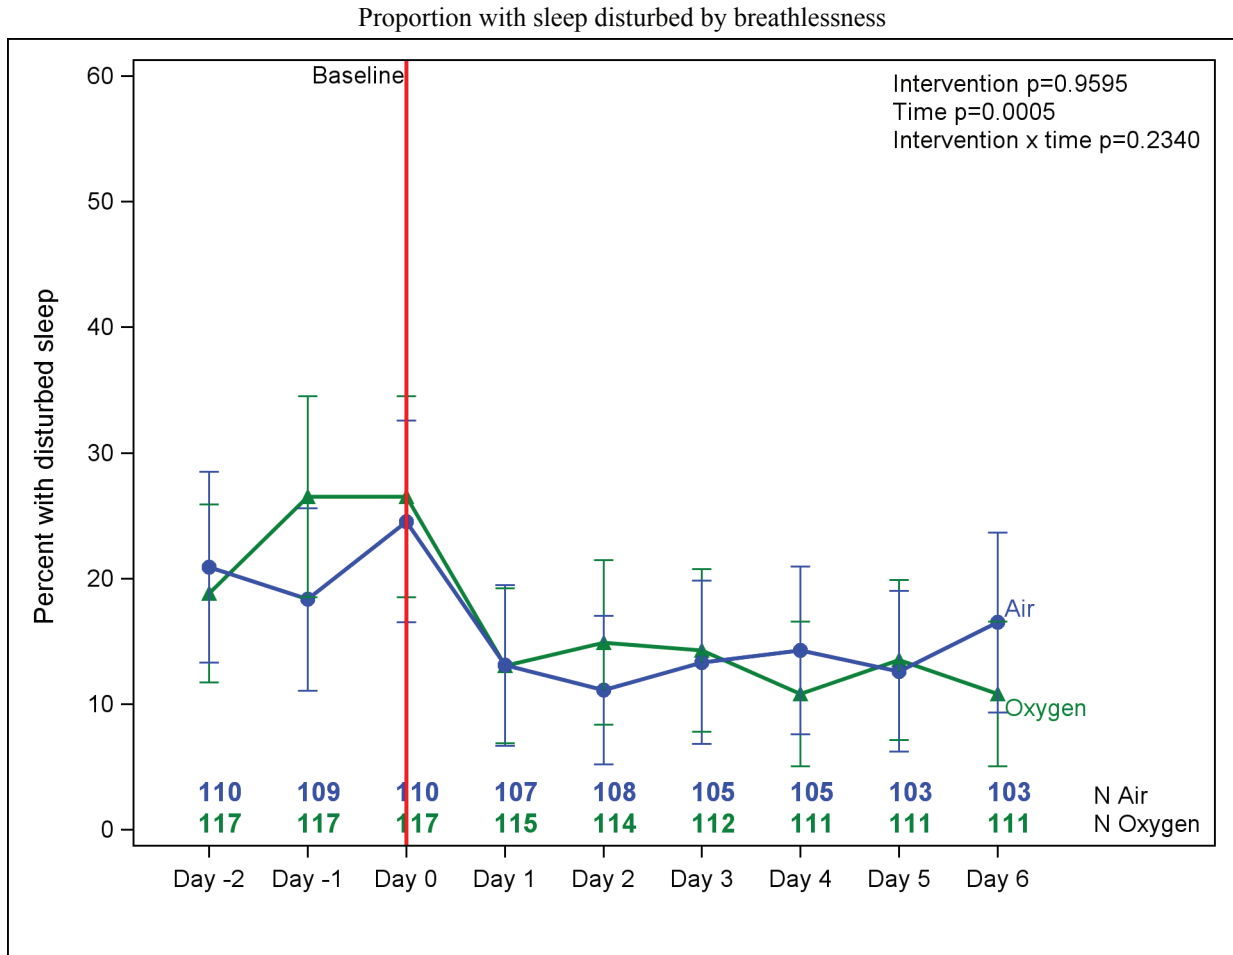

Footnote to figure 6 ('yes' = report of sleep disturbance by breathlessness; CI = confidence interval)
